# Supplementary material
Source: PubMed Central journal article supplement (PMC6733660)
Supplement: NIHMS1536244-supplement-1.pdf [file NIHMS1536244-supplement-1.pdf]

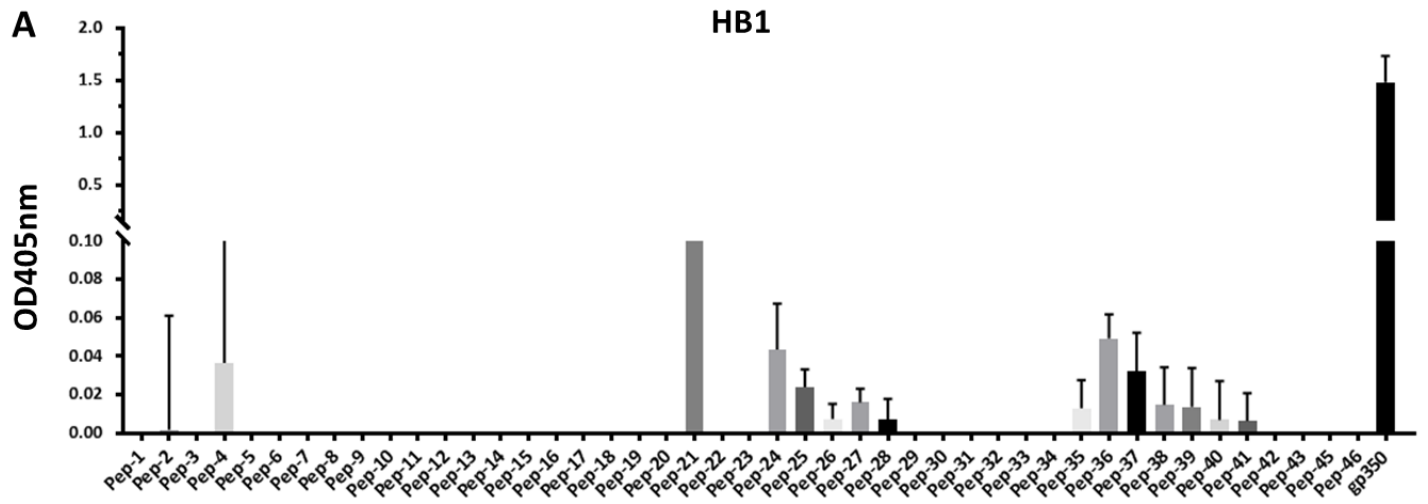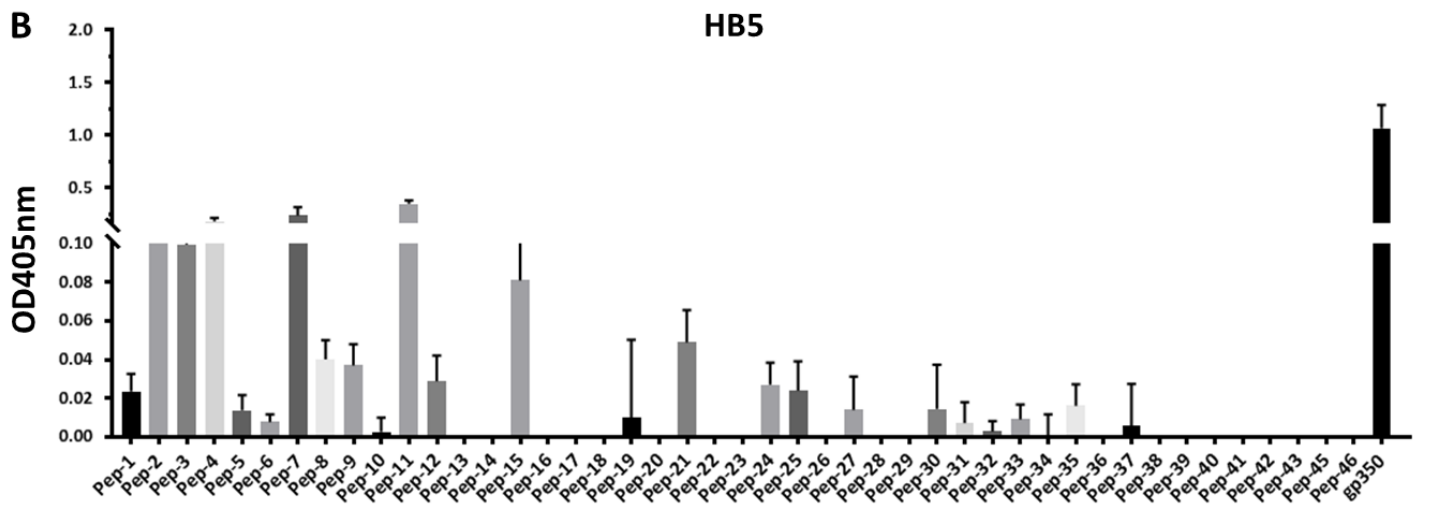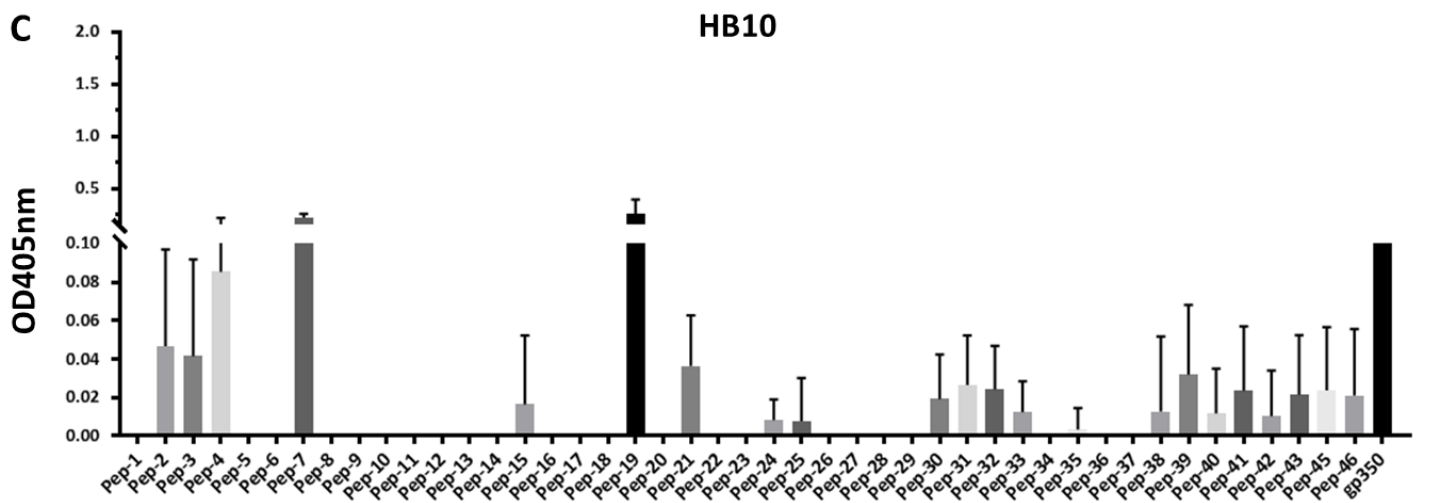

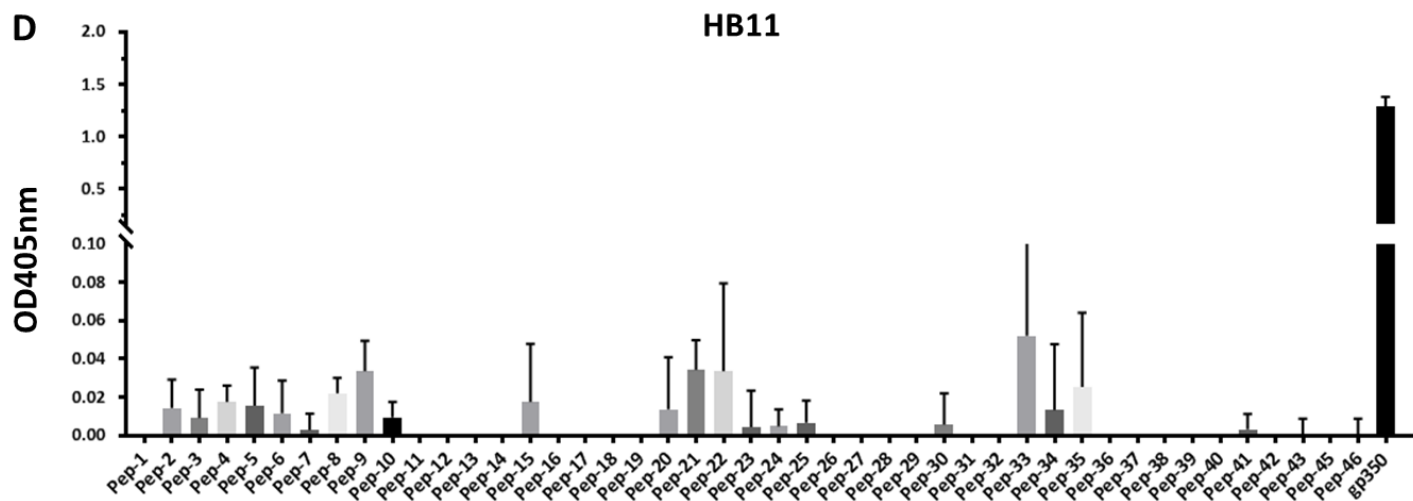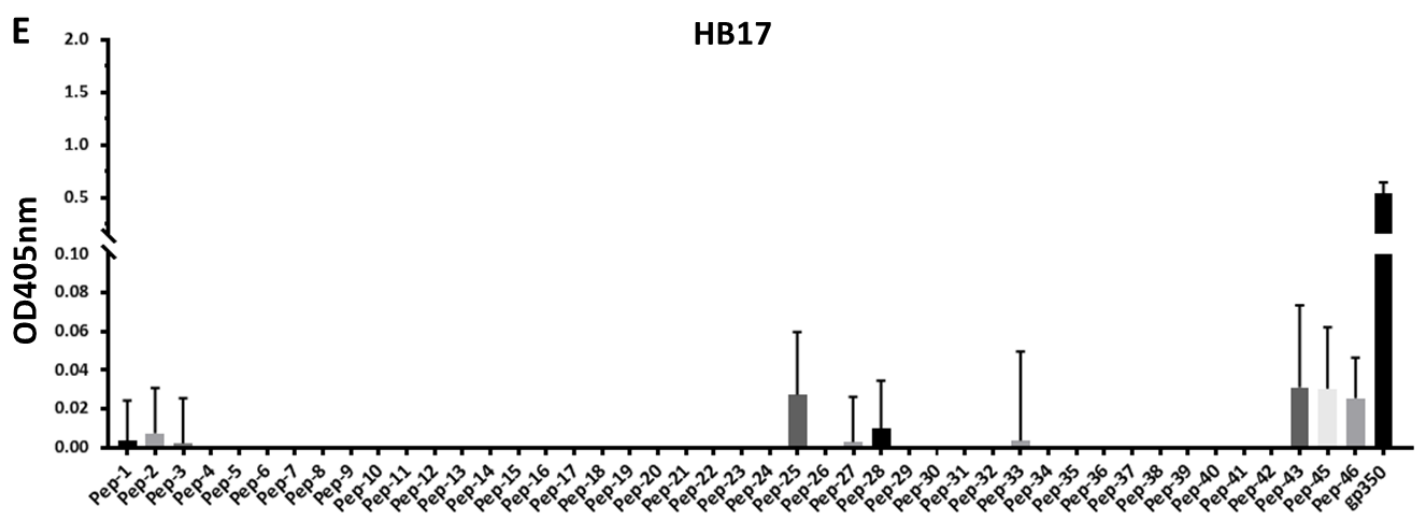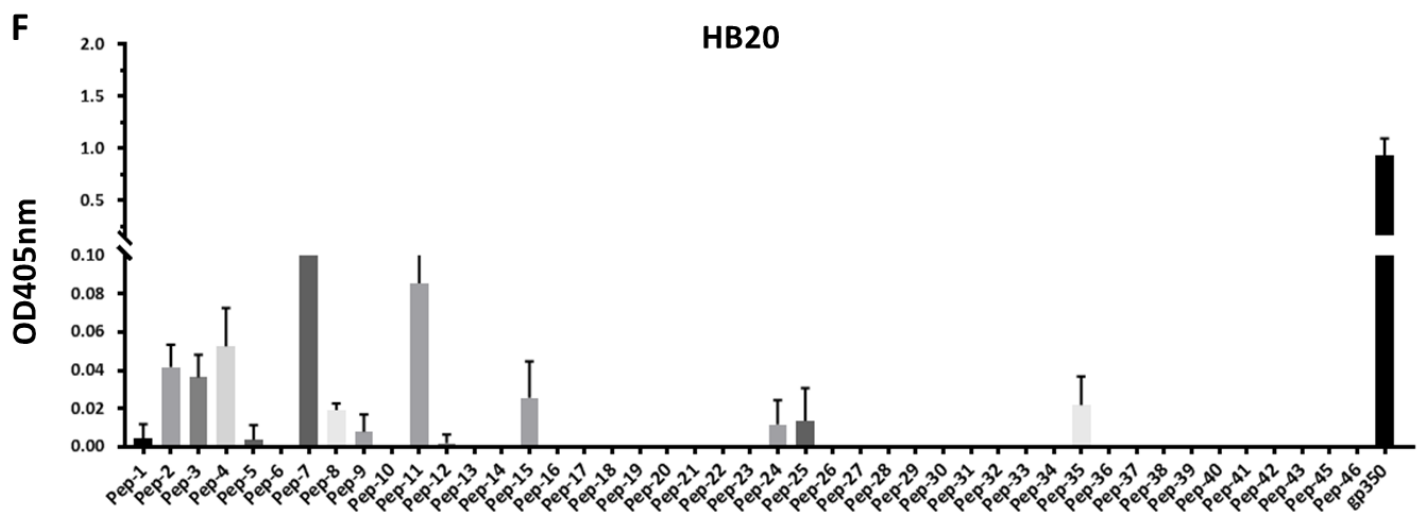

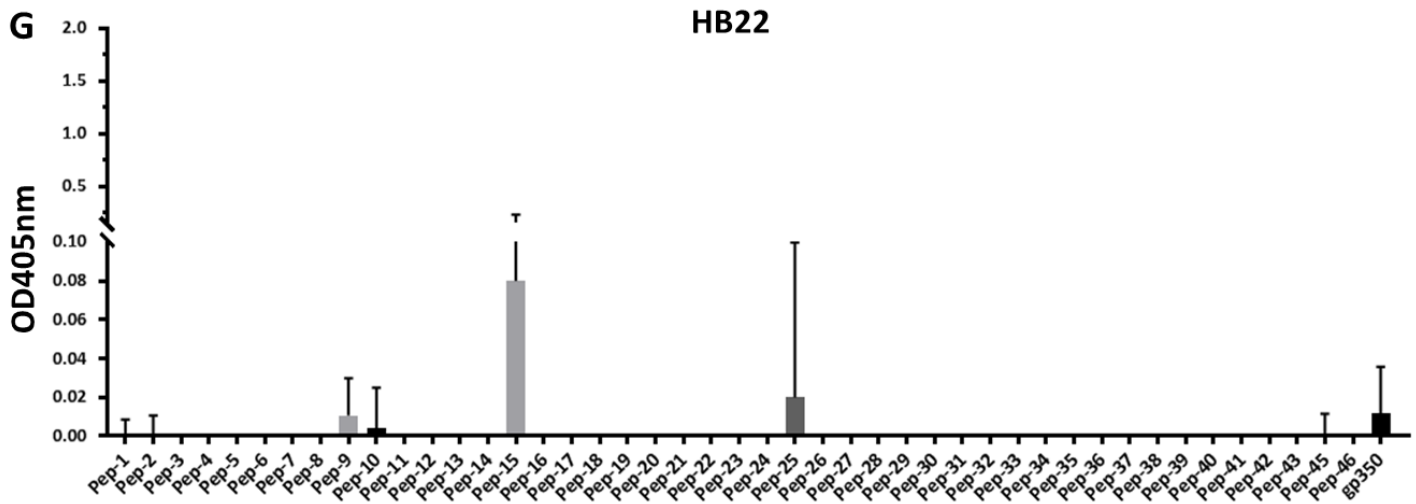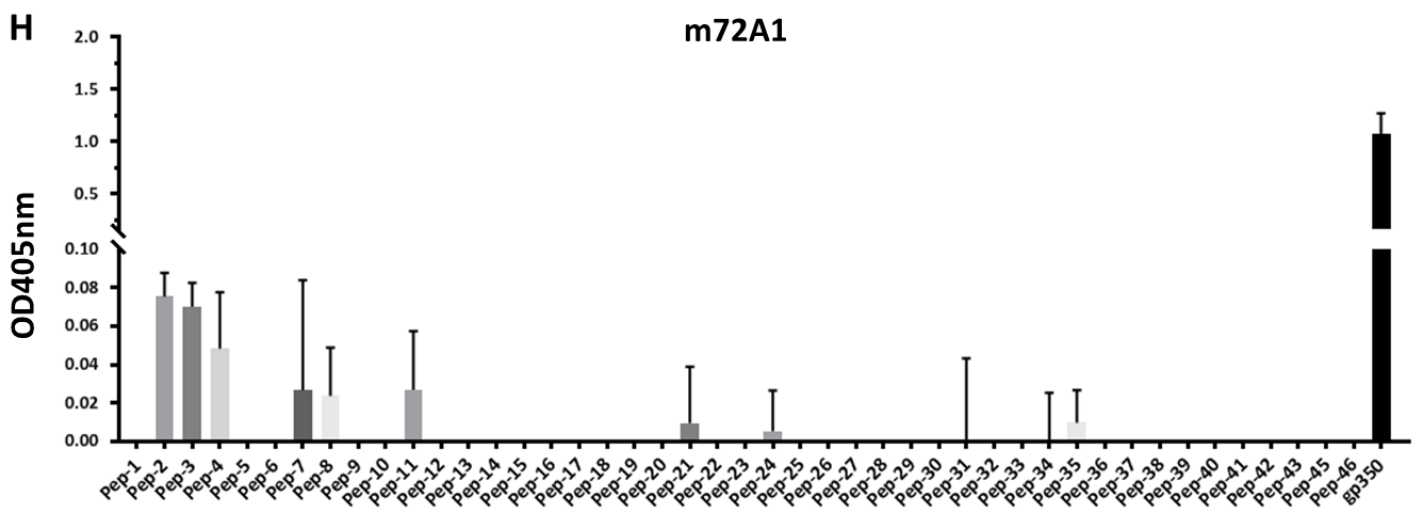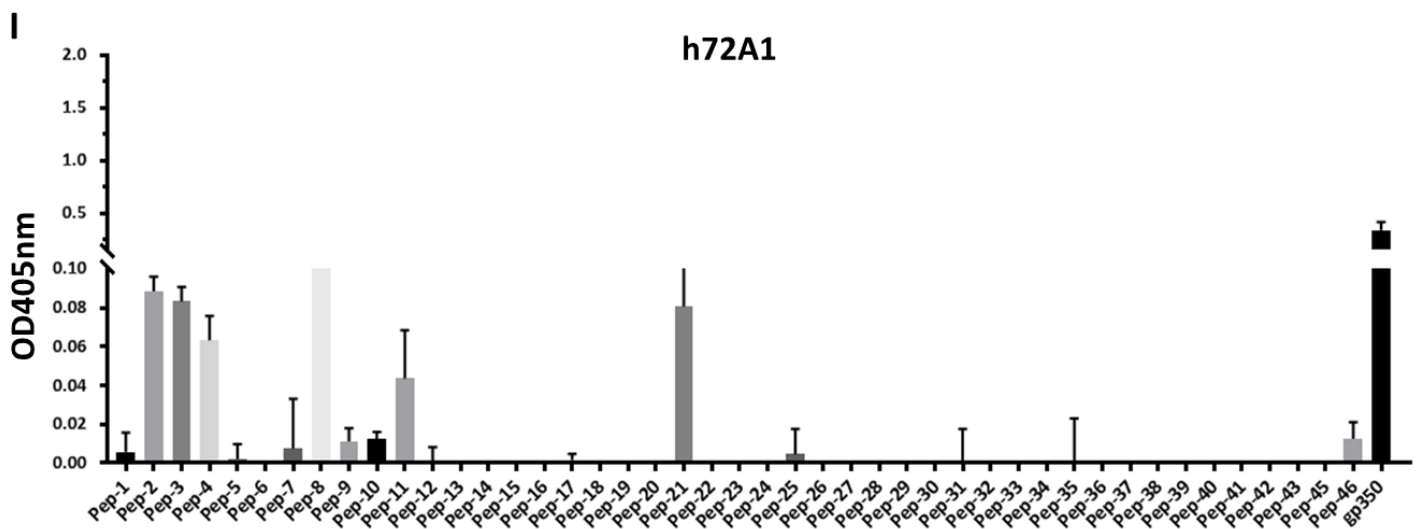

**Supplementary Figure 1: Linear antibody epitope mapping of gp350.** (A-I) ELISA was used to detect the responses of the indicated antibodies against each linear peptide. ELISA plates were coated overnight with 10  $\mu\text{g/ml}$  of each of the indicated 45 linear peptides and 0.5  $\mu\text{g/ml}$  of recombinant purified gp350 protein was used as a positive control. Plates were blocked for 1 h, washed three times, and incubated with 10  $\mu\text{g/ml}$  of each antibody for 2 h. Bound antibodies were detected using HRP-conjugated anti-mouse IgG or anti-human IgG (1:2,000).
